# Supplementary material for: A selective dual quenching sensor (EY/BG@CDs) for simultaneous monitoring of gentamicin and ketorolac levels in plasma: a highly efficient platform that caters to the needs of therapeutic drug monitoring
Source: Royal Society of Chemistry journal article supplement (doi:10.1039/d3ra04894b), 2023-01-01
Supplement: d3ra04894b1.pdf [file d3ra04894b1.pdf]

## **Electronic Supplementary Material (ESM)**

### **"A Selective Dual Quenching Sensor (EY/BG@CDs) for Simultaneous Monitoring of Gentamicin and Ketorolac Levels in Plasma: A highly efficient platform that caters to the needs of therapeutic drug monitoring"**

**Khalid Alhazzani<sup>a</sup>, Ahmed Z. Alanazi<sup>a</sup>, Aya M. Mostafa<sup>b,c</sup>, James Barker<sup>b</sup>, Mohamed M.**

**El-Wakil<sup>c</sup>, Al-Montaser Bellah H. Ali<sup>c\*</sup>**

<sup>a</sup> Department of Pharmacology and Toxicology, College of Pharmacy, King Saud University, Riyadh, Saudi Arabia

<sup>b</sup> School of Life Sciences, Pharmacy, and Chemistry, Kingston University, Kingston-upon-Thames, London KT1 2EE, UK.

<sup>c</sup> Department of Pharmaceutical Analytical Chemistry, Faculty of Pharmacy, Assiut University, Assiut, Egypt.

\*e-mail: Almontaser\_bellah@aun.edu.eg

## Fluorescence quantum yield of BG@CDs

The quantum yield (QY) of BG@CDs was calculated according to the following equation using quinine sulfate (QS) as a reference in 0.1 mol/L H<sub>2</sub>SO<sub>4</sub> (QY = 54 %). By measuring the absorbance (less than 0.05) and emission spectra of a certain concentration of BG@CDs and quinine sulfate at the same excitation wavelength at 360 nm, the absorbance and fluorescence integral area were substituted into the following formula:

$$\phi_{BG@CDs} = \phi_{QS} \times \frac{F_{BG@CDs}}{F_{QS}} \times \frac{A_{QS}}{A_{BG@CDs}} \times \frac{\eta_{BG@CDs}}{\eta_{QS}}$$

$\phi_{BG@CDs}$  represents the quantum yield of BG@CDs,  $\phi_{QS}$  represents the quantum yield of QS,  $F_{BG@CDs}$  is the fluorescence intensity of BG@CDs,  $F_{QS}$  is the fluorescence intensity of quinine sulphate, A refers to the absorbance value and  $\eta$  refers to the refractive index of the solvent (distilled water). The synthesized BG@CDs were dissolved in distilled water ( $\eta = 1.33$ ) and quinine sulfate was dissolved in 0.1 M H<sub>2</sub>SO<sub>4</sub> ( $\eta = 1.33$ ).

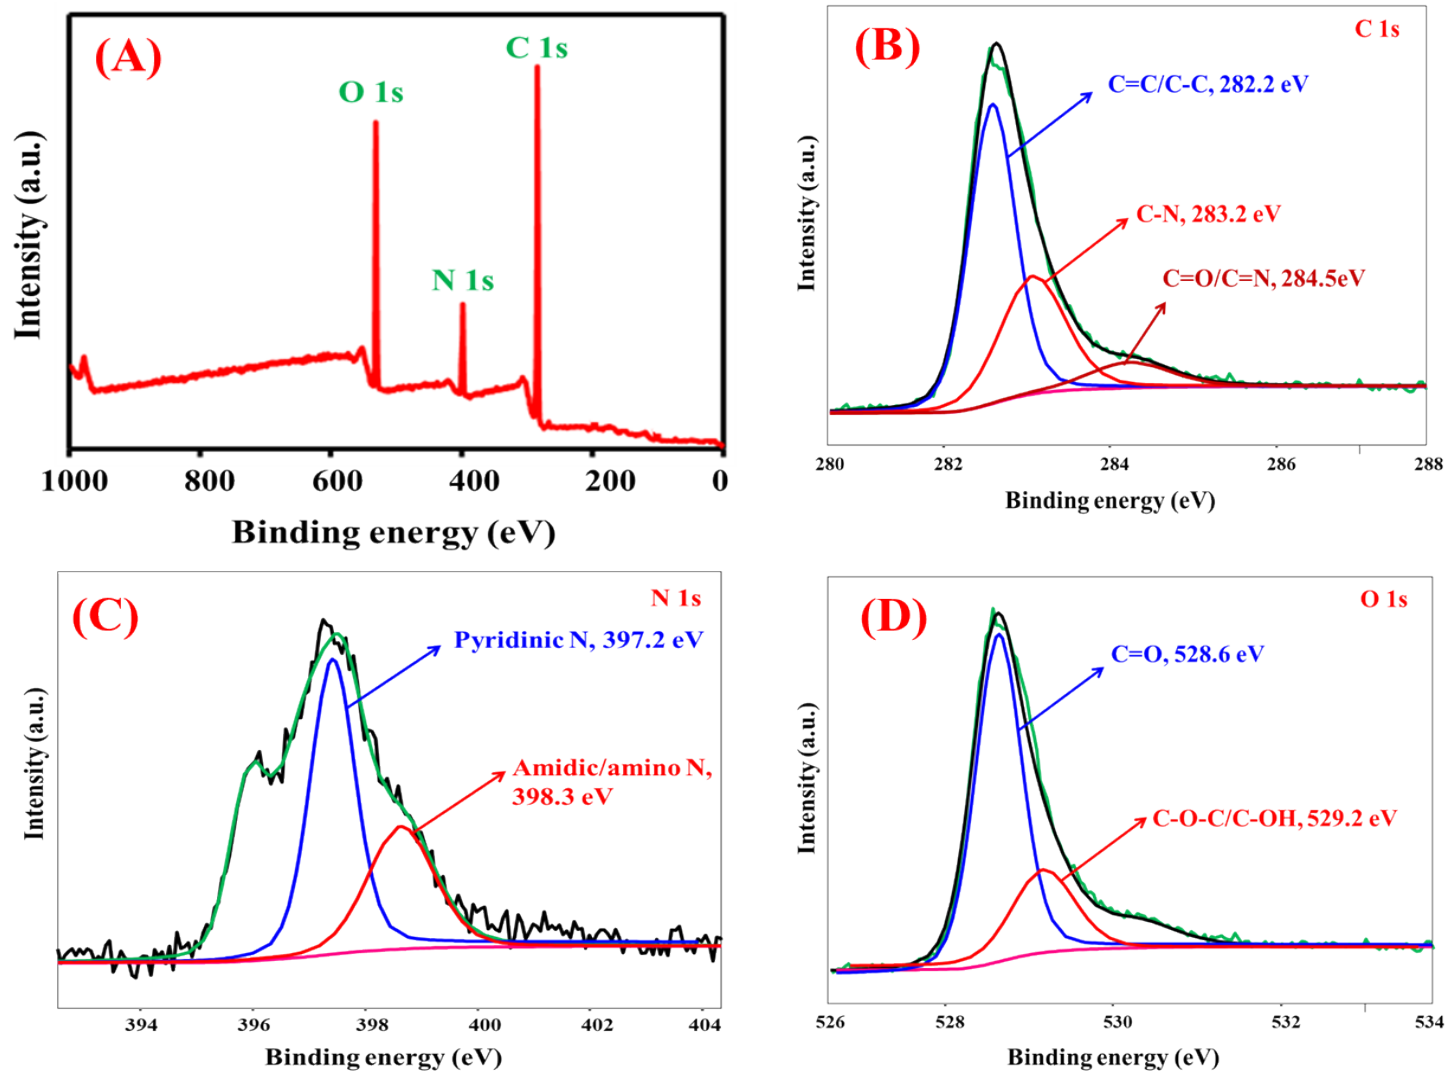

Fig. S1. Full XPS survey (A), C 1s (B), N 1s (C), and O 1s (D) spectra of BG@CDs

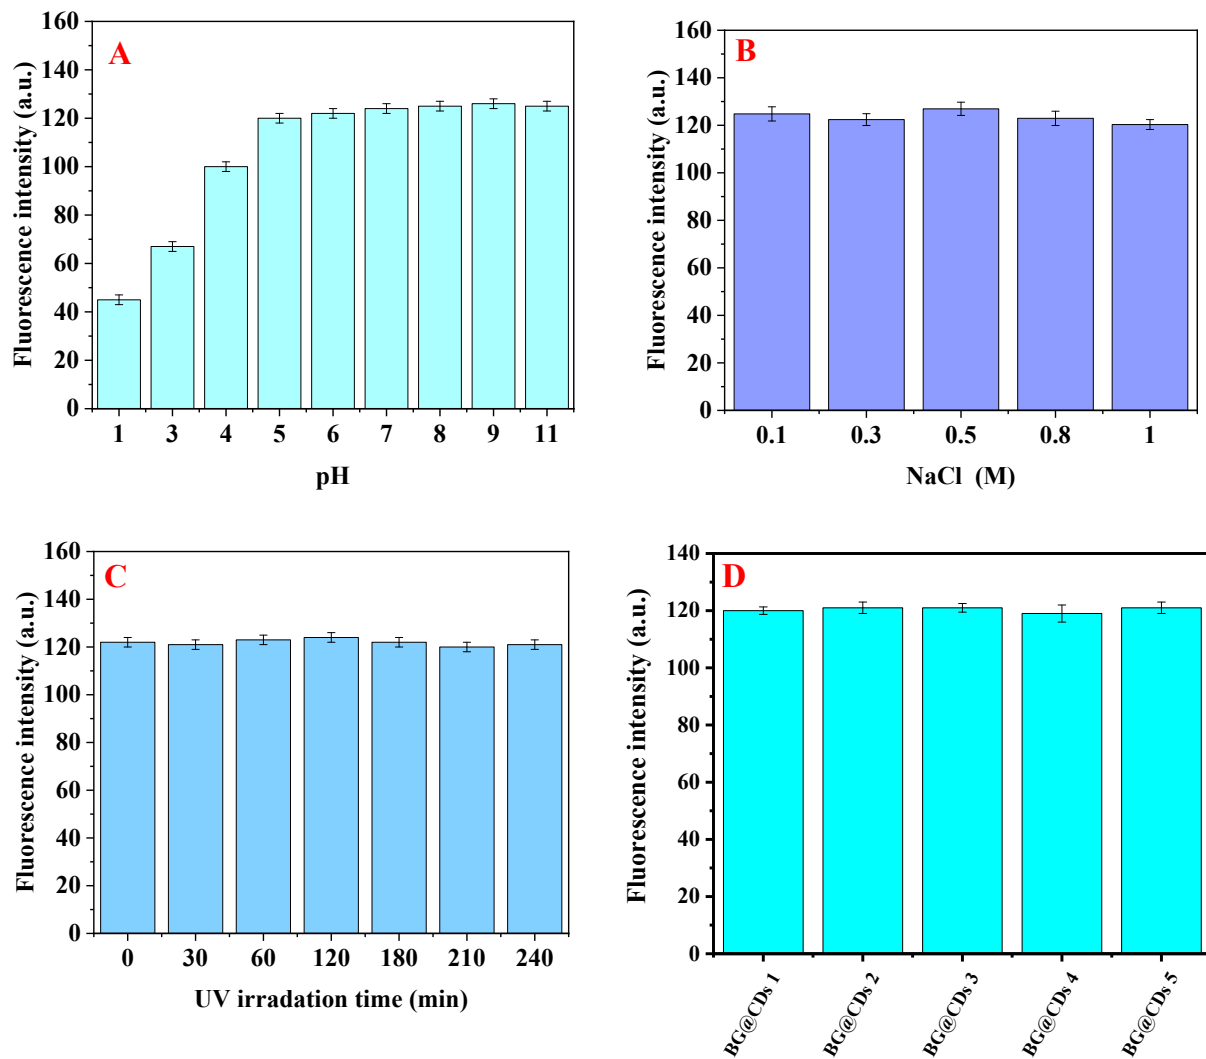

**Fig. S2.** Effect of (A) pH (1–11), (B) ionic strength (0.1–1.0 M), (C) UV irradiation time (0–240 min) and (D) different patches of black grapes (*Vitis vinifera*) on fluorescence intensity of BG@CDs.

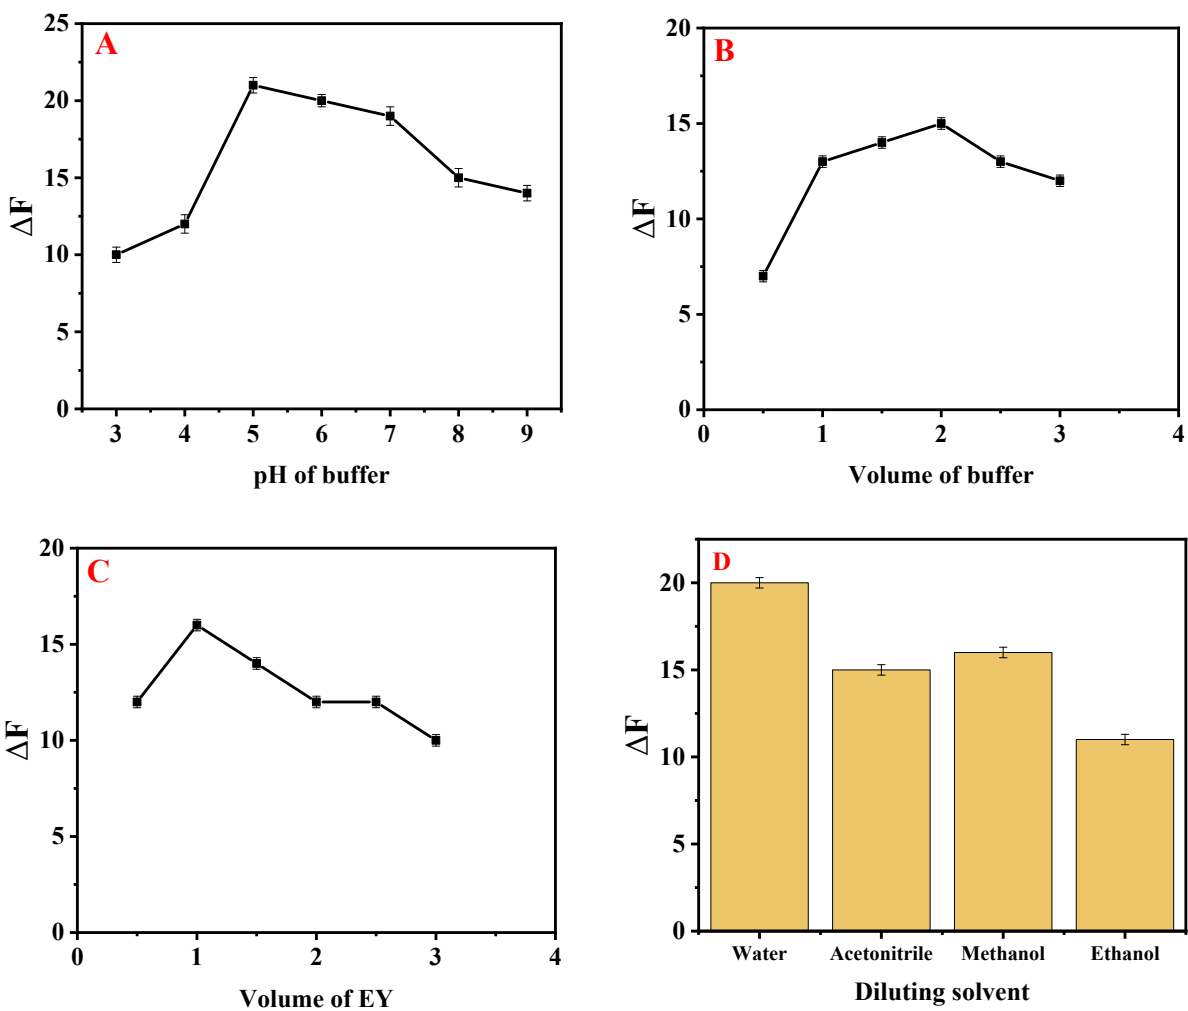

**Fig. S3** (A) Effect of buffer pH, (B) Effect of buffer volumes, (C) Effect of eosin Y volumes, and (D) Effect of different diluting solvents on  $\Delta F$  using  $100 \text{ ng mL}^{-1}$  of GNT.

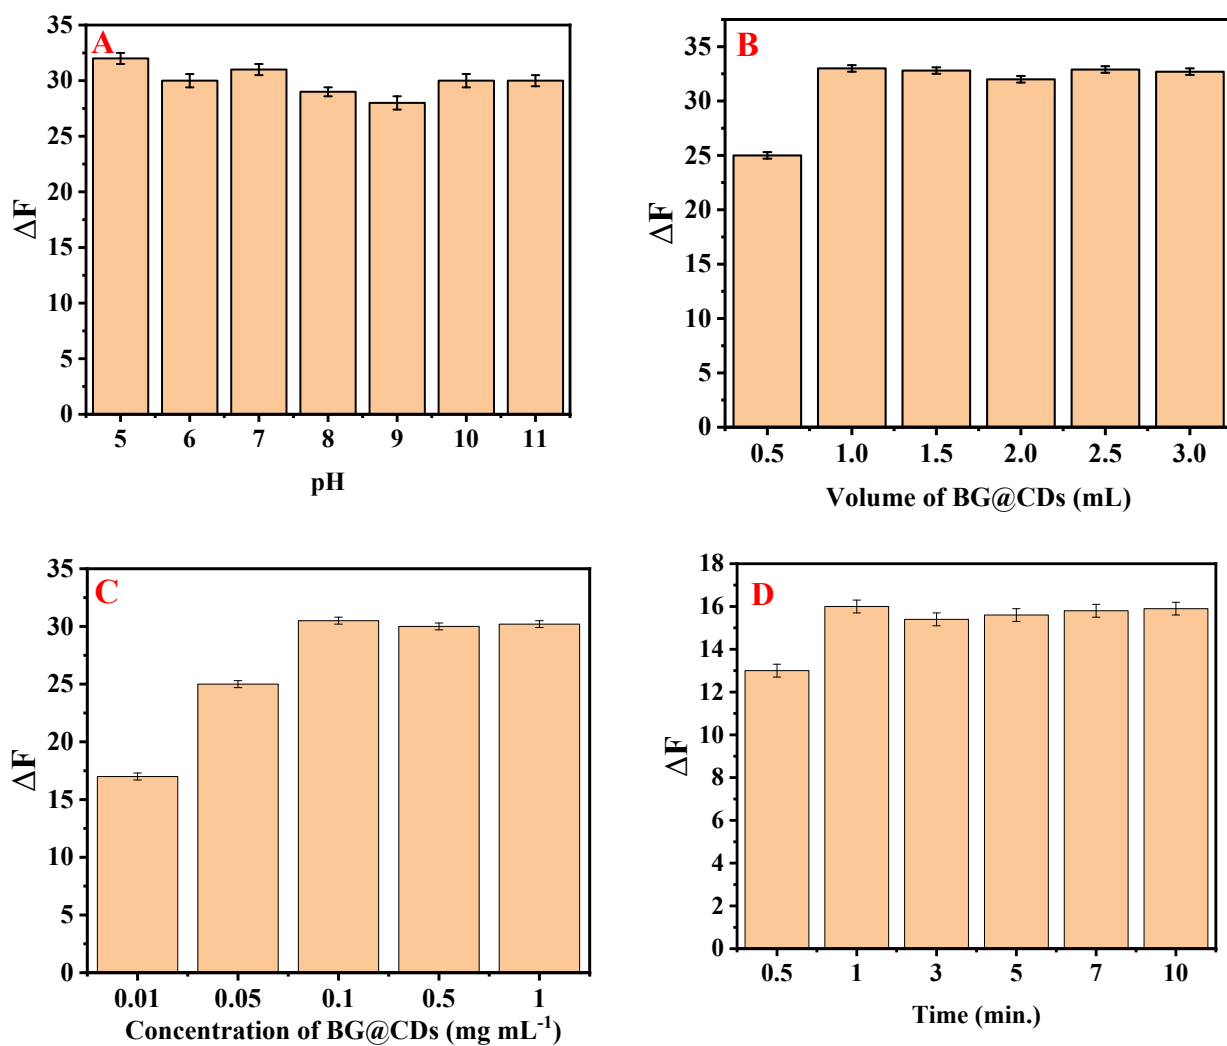

**Fig. S4.** Influence of the factors affecting  $\Delta F$  and interactions between BG@CDs and KET ( $180 \text{ ng mL}^{-1}$ ). (A) pH (5–11), (B) volume of BG@CDs (0.5–3.0 mL), (C) concentration of BG@CDs ( $0.01\text{--}1.0 \text{ mg mL}^{-1}$ ), (D) incubation time (0–10 min.).

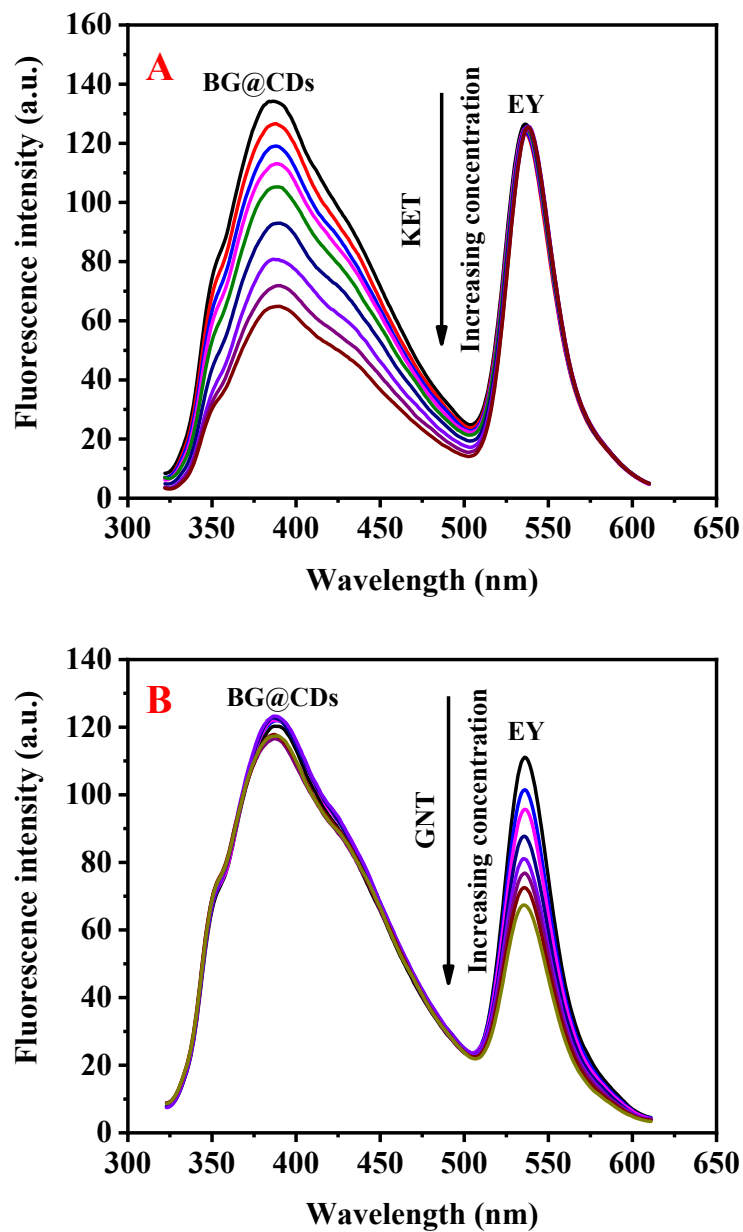

**Fig. S5** The influence of different concentrations of (A) KET (20 – 400 ng mL<sup>-1</sup>) and (B) GNT (50 – 200 ng mL<sup>-1</sup>) on the fluorescence emission of EY/BG@CDs.

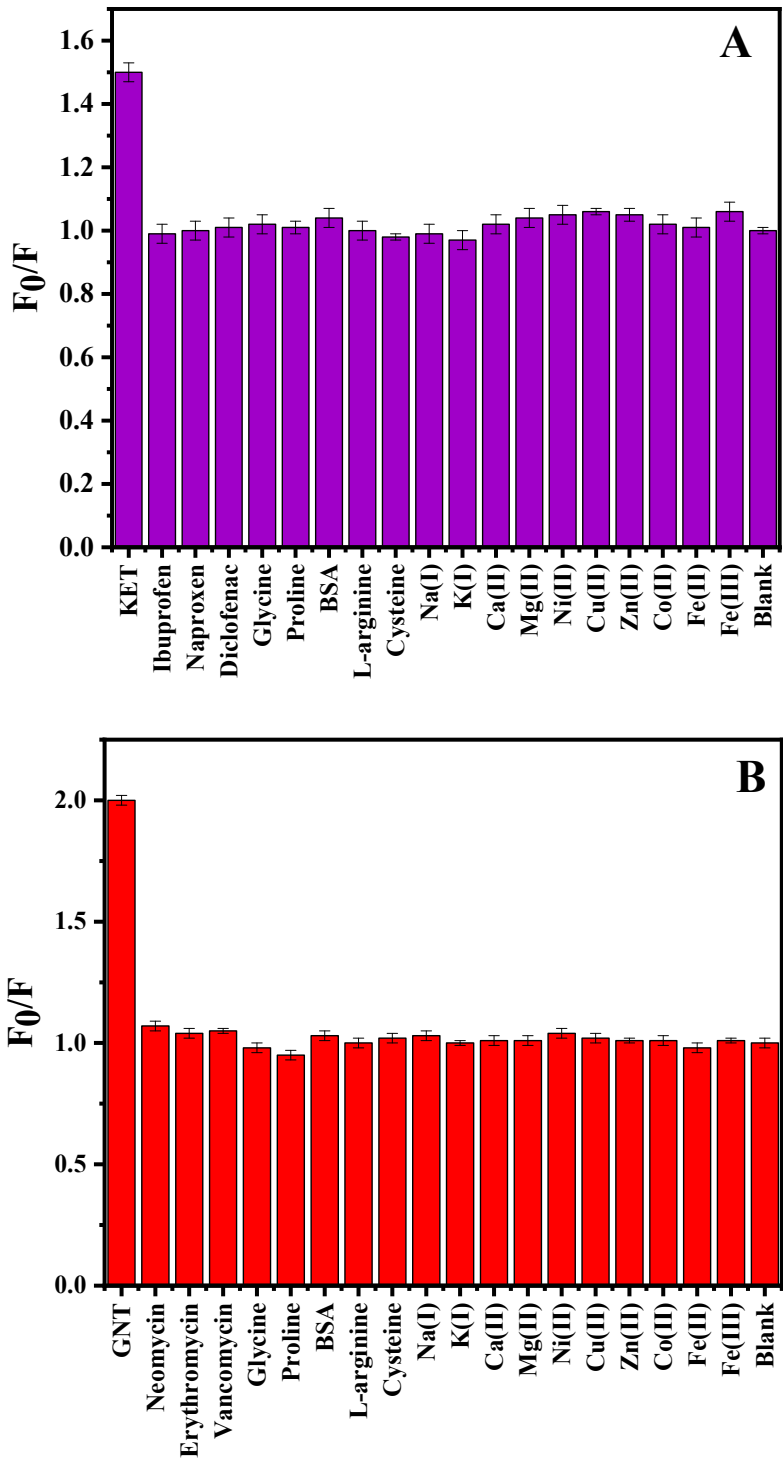

**Fig. S6** (A) Relative fluorescence intensity after incorporation of different species to the prepared BG@CDs; (B) The effect of different species on the relative fluorescence intensity of



EY.

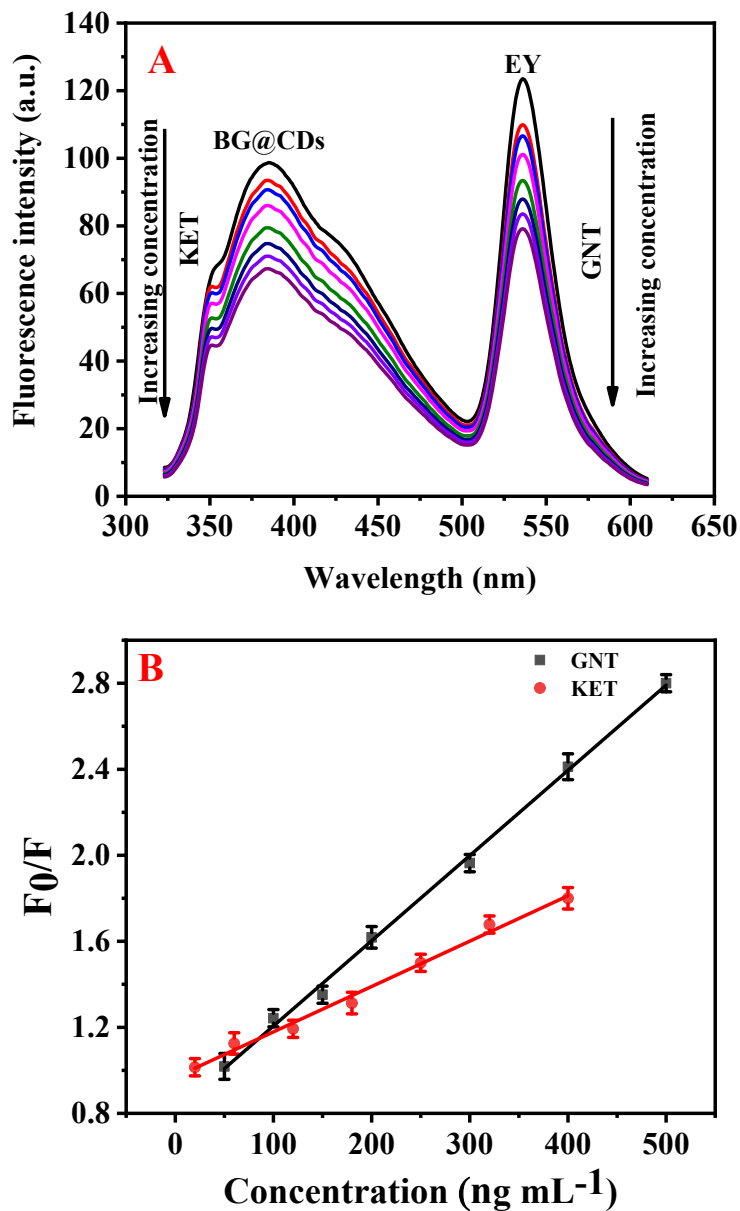

**Fig. S7** (A) The influence of different concentrations of GNT (60 – 500  $\text{ng mL}^{-1}$ ) and KET (25 – 400  $\text{ng mL}^{-1}$ ) on the fluorescence emission of EY and BG@CDs for their simultaneous determination in spiked rabbit plasma, respectively. (B) Plot of ( $F_0/F$ ) versus concentration of GNT/KET.
